# Supplementary material for: Probing the effect of the Si/Al ratio in Cu-CHA zeolite catalysts on SO2 exposure: in situ DR UV-vis spectroscopy and deactivation measurements
Source: Royal Society of Chemistry journal article supplement (doi:10.1039/d4cy00129j), 2024-01-01
Supplement: d4cy00129j1.pdf [file d4cy00129j1.pdf]

ARTICLE

### Supplementary Information

In all experiments the catalysts were first heated at (400 °C for DR UV-Vis and 550 °C for SO<sub>2</sub> uptake and catalytic testing) in 10% O<sub>2</sub>/N<sub>2</sub> flow and left at this temperature for 1 hour. The following steps are described for the four different procedures:

- Cooling in 10% O<sub>2</sub>/N<sub>2</sub> flow at 200 °C, resulting in the formation of framework coordinated Cu<sup>II</sup> sites (fw-Cu<sup>II</sup>).
- 1% H<sub>2</sub>/N<sub>2</sub> flow at 400 °C for 1 hour, followed by cooling in the same atmosphere to 200 °C, resulting in the formation of framework coordinated Cu<sup>I</sup> sites (fw-Cu<sup>I</sup>).
- Cooling in 10% O<sub>2</sub>/N<sub>2</sub> flow at 200 °C, followed by 20 minutes N<sub>2</sub> purge and subsequent exposure to NO/NH<sub>3</sub> (500 ppm/600 ppm, rest N<sub>2</sub>), resulting in the formation of 'mobile' [Cu<sup>I</sup>(NH<sub>3</sub>)<sub>2</sub>]<sup>+</sup> complex.
- The same procedure as in c), followed by N<sub>2</sub> purge and exposure to 10%O<sub>2</sub>/N<sub>2</sub> for 30 min, resulting in the formation of [Cu<sup>II</sup><sub>2</sub>(NH<sub>3</sub>)<sub>4</sub>O<sub>2</sub>]<sup>2+</sup> complexes.

Then subsequently the catalysts were exposed to 50 ppm SO<sub>2</sub>/N<sub>2</sub> followed by the DR UV-Vis experiments and 100 ppm SO<sub>2</sub>/N<sub>2</sub> for SO<sub>2</sub> uptake and catalytic testing measurements at 200 °C.

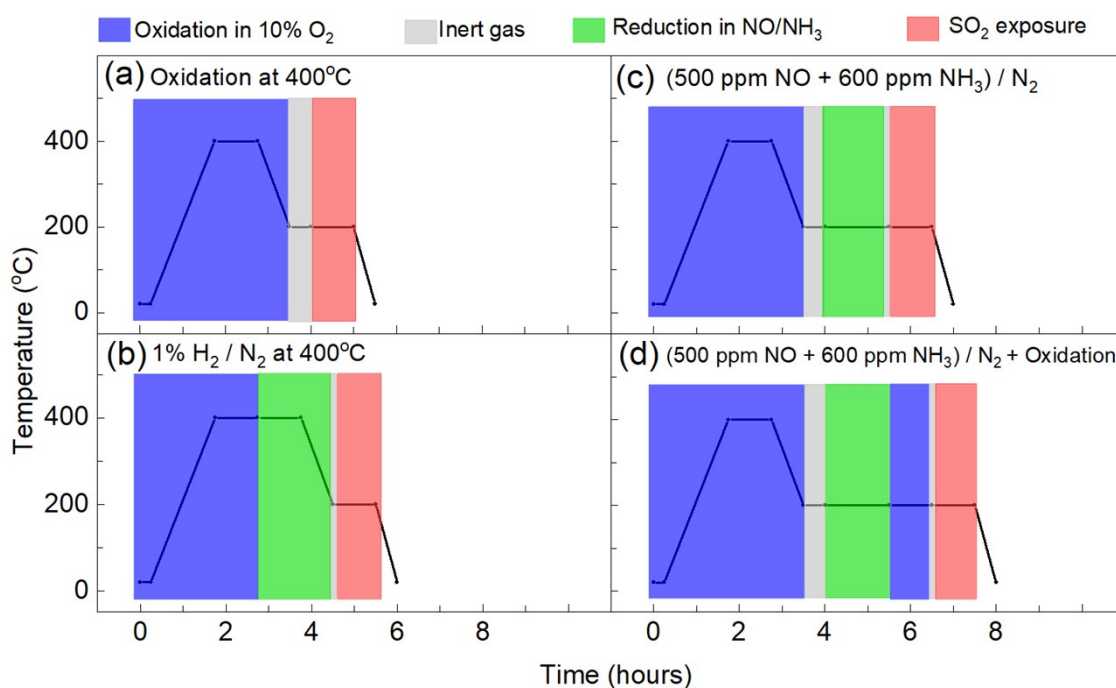

Fig. S 1 Schematic representation of the four procedures carried out to obtain (a) fw-Cu<sup>II</sup>, (b) fw-Cu<sup>I</sup>, (c) [Cu<sup>I</sup>(NH<sub>3</sub>)<sub>2</sub>]<sup>+</sup> complexes and (d) [Cu<sup>II</sup><sub>2</sub>(NH<sub>3</sub>)<sub>4</sub>O<sub>2</sub>]<sup>2+</sup> complexes, and subsequent exposure to SO<sub>2</sub>/N<sub>2</sub>.

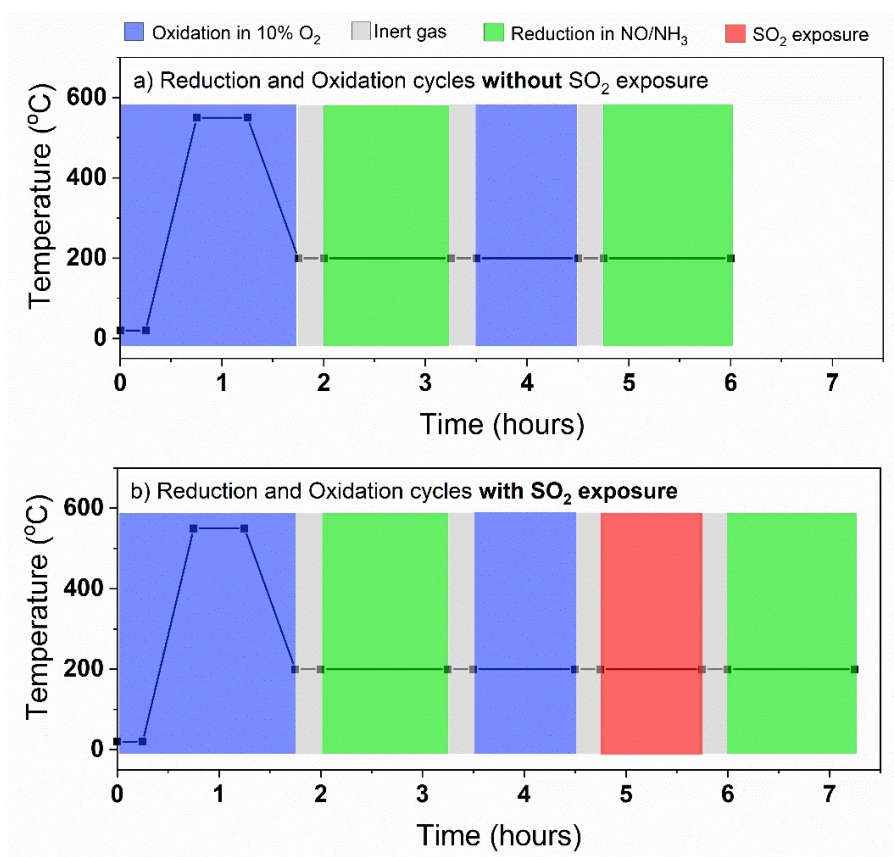

Fig. S 2 Schematic representation of oxidation and reduction cycles a) without SO<sub>2</sub>, and b) with SO<sub>2</sub> at 200 °C.

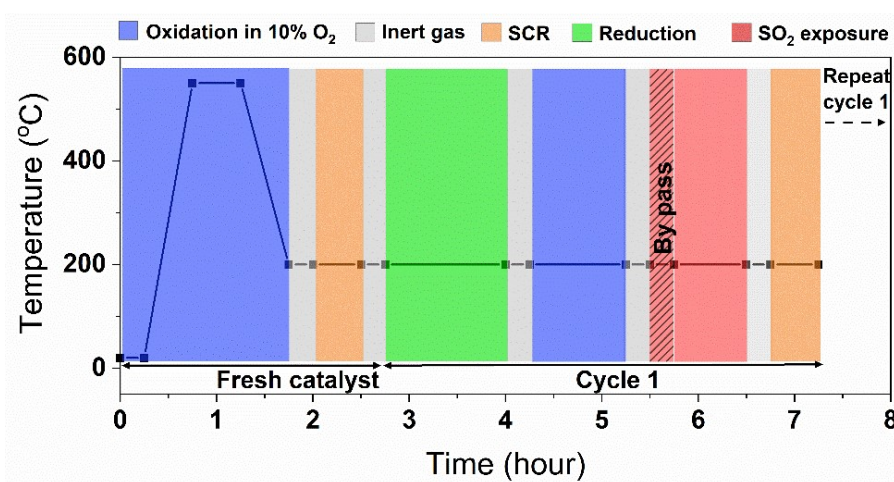

Fig. S 3 Schematic representation of repeated SO<sub>2</sub> exposure procedure to measure SO<sub>2</sub> uptake during SO<sub>2</sub> exposure and deactivation.

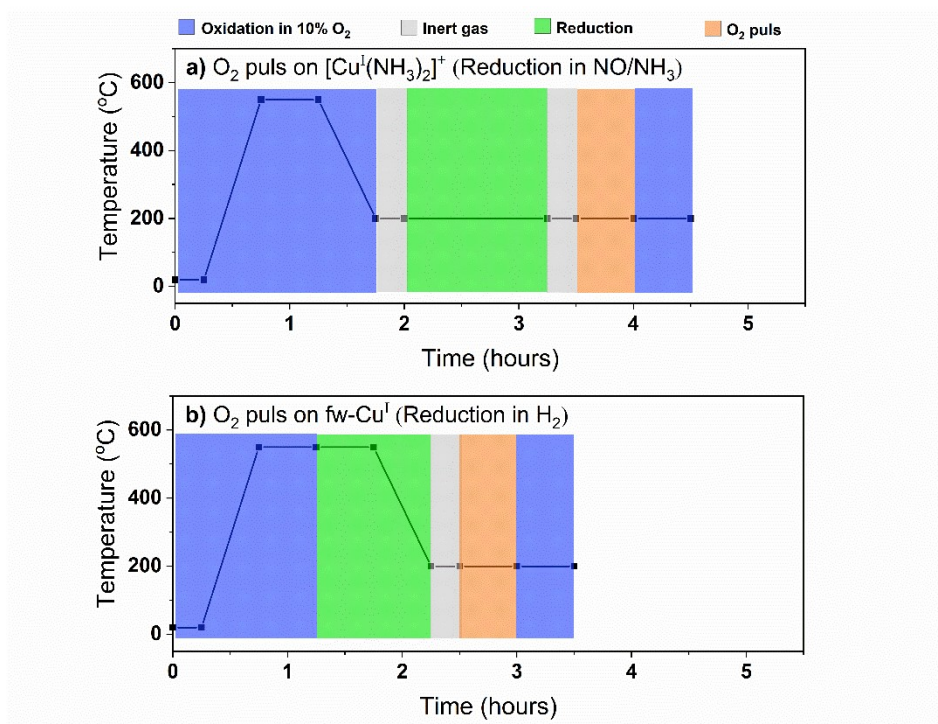

Fig. S 4 Schematic representation of O<sub>2</sub> pulse procedures on a) [Cu<sup>I</sup>(NH<sub>3</sub>)<sub>2</sub>]<sup>+</sup> and b) fw-Cu<sup>I</sup> at 200 °C.
